# Supplementary material
Source: publisher site journal article supplement (https://www.dovepress.com/article/supplementary_file/546762/546762%20Revised%20Appendix.docx)
Supplement: Supplementary file 1 [file 546762%20Revised%20Appendix.docx]

**Participant Information Sheet and Consent Form**

**Study Title:** Multicenter Randomized Controlled Trial of Transcutaneous Auricular Vagus Nerve Stimulation for Prevention of Postoperative Delirium in Older Adults Undergoing Total Knee Arthroplasty

**Principal Investigator:** Dr Lei Chen, Department of Anesthesiology, People’s Hospital Affiliated to Fujian University of Traditional Chinese Medicine, Fuzhou, China.

**Emergency contact number:** +86-15980287770

**Sponsor/Funder(s):** Fujian Provincial Health Technology Project (2024QNA072, 2024CXA046), Fujian Medical University Startup Fund for Scientific Research (No. 2023QH1180), Fujian Province Traditional Chinese Medicine Technology Project (No. 2025YBA014), National Natural Science Foundation Basic Research Enhancement Program (JCZX202404), and Fujian University of Traditional Chinese Medicine (XB2024002).

**Introduction**

We invite you to participate in a clinical trial approved by the People’s Hospital Affiliated with Fujian University of Traditional Chinese Medicine. The study is titled “Transcutaneous Auricular Vagus Nerve Stimulation for Preventing Postoperative Delirium in Older Adults Undergoing Total Knee Arthroplasty: A Multicenter Randomized Controlled Trial.”

Delirium after knee replacement surgery is a common and severe complication in older patients, often leading to poor outcomes. Transcutaneous auricular vagus nerve stimulation (taVNS) has shown potential in modulating neuroinflammation and autonomic nervous system function. However, its effects on postoperative delirium in older adults having joint replacement surgery have not been systematically studied.

Our research aims to assess whether taVNS can prevent delirium after total knee arthroplasty in older adults. This information sheet provides details to help you decide whether to participate. Please read it carefully and ask any questions you may have. We will ensure that all your questions are answered before you decide whether to participate.

**Background**

Postoperative delirium is a common complication after surgery and anesthesia, typically occurring within 1 to 3 days after the procedure. Sudden and fluctuating changes in consciousness, attention, and thinking characterize it. Risk factors for postoperative delirium include advanced age, polypharmacy, and surgical trauma-induced systemic inflammation. The exact causes of postoperative delirium are not fully understood. Still, evidence suggests a link between neuroinflammation, autonomic nervous system dysregulation, and blood-brain barrier disruption.

Delirium is prevalent in older patients after knee surgery, with about 23.9% of patients experiencing it after total knee arthroplasty. This condition can lead to severe outcomes such as increased risk of death, extended hospital stays, and long-term cognitive decline. Current pharmacological interventions for postoperative delirium have limited efficacy and safety concerns. Transcutaneous auricular vagus nerve stimulation (taVNS), a non-invasive neuromodulation technique delivering electrical stimulation to the tragus region (an area rich in vagal afferents), has shown promise in suppressing pro-inflammatory cytokines and restoring autonomic balance.

While taVNS has demonstrated neuroprotective effects in conditions like depression and epilepsy and is recognized for its safety profile and ease of administration, there is insufficient evidence of its effectiveness in preventing postoperative delirium, specifically following total knee arthroplasty. This study aims to address this critical gap in perioperative care.

**Purpose of the study**

This study aims to evaluate whether taVNS can reduce the incidence of postoperative delirium in elderly patients undergoing total knee arthroplasty. We hypothesize that taVNS will decrease delirium by downregulating pro-inflammatory cytokines (IL-6, TNF-α) and restoring heart rate variability, measured by 5-minute electrocardiogram recordings. The findings will offer valuable insights for integrating neuromodulation therapies into enhanced recovery pathways to reduce postoperative delirium in older adults. Improving delirium management through this non-pharmacological intervention could enhance postoperative recovery and potentially reduce hospital costs by 18–22% through shorter ICU stays and lower complication rates.

**Do I have to take part?**

Your participation in this study is entirely voluntary. You can refuse participation or withdraw from the study anytime without affecting your medical care. Your decision will not lead to discrimination or retaliation, and your medical treatment and rights will remain unchanged. If you decide not to participate or choose to withdraw, please inform your doctor. Your health remains our top priority.

**How many participants will take part in this?**

This multicenter study will recruit 1,448 older adults across four hospitals in Fujian Province, China: People’s Hospital Affiliated with Fujian University of Traditional Chinese Medicine (primary center), The Second Affiliated Hospital of Fujian University of Traditional Chinese Medicine, Mengchao Hepatobiliary Hospital of Fujian Medical University, and Fujian Provincial Hospital. The study design is prospective, randomized, double-masked, and sham-controlled. We expect the study to take two years to complete. We aim to improve postoperative rehabilitation and outcomes for older patients having elective total knee arthroplasty.

**What will happen if I take part?**

If you choose to participate, you will be randomly assigned to the active taVNS or sham stimulation group. Stimulation will be administered twice: once on the afternoon before surgery and again on the morning of surgery prior to anesthesia induction. A certified technician will apply non-invasive electrode patches to the cymba conchae and tragus (outer ear region rich in vagus nerve fibers) using 25Hz/250μs electrical pulses in the active group. The sham group will receive identical-appearing stimulation on the antihelix and earlobe (area with minimal nerve connections). Neither you nor the research team will know your group assignment during the study. Each 30-minute session will involve adjustable stimulation intensity (0.1–5mA) to ensure comfortable tingling without pain. We will primarily assess the occurrence of delirium within 72 hours after your operation. We will also evaluate delirium severity, biological markers, heart rate variability, pain, recovery quality, sleep quality, and side effects.

**What information will be collected from me?**

When you enroll, we will collect personal information such as your name, phone number, age, sex, and hospital ID number for follow-up purposes and to describe our study sample. Over a one-year follow-up period, we will assess various aspects of your health. These assessments include checking for delirium within 72 hours after surgery, evaluating its severity and types if present, assessing your cognitive function, measuring your anxiety and depression levels, recording your pain scores, evaluating your recovery and sleep quality, tracking your hospital stay length, and monitoring for any side effects. All this information helps us understand how the treatment may affect your recovery after surgery.

**Are there any risks in taking part?**

Participation in this study involves some risks. You will receive general anesthesia, which includes opioid drugs that may cause side effects such as nausea, vomiting, and itching. However, we use these drugs in strict accordance with enhanced recovery protocols to minimize risks. The taVNS procedure may cause temporary skin redness or mild tingling at the electrode sites (cymba conchae, tragus, antihelix, and earlobe), which typically resolve within 48 hours. In rare cases, participants may develop skin irritation from the adhesive patches. We use sterile single-use electrodes and continuously monitor stimulation intensity (0.1–5mA range) to ensure safety. Potential risks include skin irritation, dizziness, headache, or paraesthesia at the stimulation site. All adverse events will be monitored and documented according to international safety guidelines (CTCAE v5.0). If you experience discomfort, we will immediately adjust or pause the stimulation. Your comfort and safety are our priorities, with 24-hour medical support available for any persistent reactions. All study-related complications will receive free treatment per hospital guidelines.

**Are there any benefits to taking part?**

Participation in this study offers potential benefits. You will receive free taVNS treatment and related neurological monitoring. This non-invasive stimulation may help reduce your risk of developing postoperative delirium, improve autonomic nervous system balance, and decrease surgical stress responses. It could also support cognitive recovery and reduce inflammation-related complications. While these benefits are not guaranteed, your participation will contribute to developing safe, non-invasive prevention strategies for postoperative cognitive complications in elderly surgical patients. Though direct benefits may vary, your involvement will advance medical understanding to improve care for future patients undergoing similar procedures potentially.

**Can I change my mind about taking part?**

Yes, you can withdraw from the study at any time. You do not need to give a reason, and your decision will not affect the quality or timing of your medical care. If you withdraw, we will keep and use any data we have already collected, but we will not collect any new information from you.

**Can the research team ask me to leave the study?**

Yes, your doctor or a research team member may need to take you out of the study, even if you want to continue. This might happen if:

- You experience side effects or develop a medical condition that makes it unsafe for you to continue studying.
- We discovered that you met one of the study’s exclusion criteria (reasons why someone should not be in the study).

If this happens, we will explain the reasons to you entirely.

**Will I have to pay for anything?**

- The taVNS treatment in this study is provided free of charge. However, you will need to pay for any other examinations or treatments you receive, including those for other conditions.
- If the study treatment is ineffective and you must switch to a different treatment, you will be responsible for those costs. However, all safety-related care (e.g., treatment for adverse events) will be free.
- We will closely monitor you for any side effects through regular check-ups after your surgery. If you experience any side effects related to the study treatment, we will provide necessary care at no cost.

Understanding the costs you might face before participating in the study is important.

**Will my information be kept confidential?**

We are committed to protecting your privacy:

- Your medical records will be kept securely at the hospital.
- Only authorized individuals will have access to your records. This includes researchers, research authorities, and ethics committees.
- We will not reveal your identity in any public reports about this study.
- We will take all legal measures to protect the privacy of your personal medical information.

However, absolute confidentiality cannot be guaranteed. If you have any concerns about your privacy, please discuss them with the research team.

**Are there any conflicts of interest?**

The researchers involved in this study have declared that they have no conflicts of interest. This means that none of the researchers stand to gain financially or personally from the outcome of this study in a way that might influence how they conduct or report the research.

**Who can I contact if I have questions?**

If you have questions about the study:

- Contact: Dr. Chen Lei
- Phone: +86-15980287770

If you have concerns about your rights as a participant or want to report any issues:

- Contact: Medical Department and Medical Ethics Committee, People’s Hospital Affiliated with Fujian University of Traditional Chinese Medicine
- Phone: +86-0591-83942105

You can contact these numbers for:

- Questions about the research
- Reporting any difficulties or concerns
- Providing feedback or suggestions
- Inquiries about your rights as a study participant

**Participant’s Statement**

Please tick the boxes if you agree:

□ I have read and understood the information provided about this study.

□ I understand the risks and potential benefits of participating.

□ I am volunteering to take part in this study.

□ I understand that I can withdraw anytime without a reason.

Please answer the following:

Have your medical records or pathological specimens been used in other studies besides this one?

□ Yes □ No

Signature: ______________________ Date: _______________

Print Name: _____________________
